# Supplementary material
Source: PubMed Central journal article supplement (PMC7914134)
Supplement: NIHMS1632028-supplement-sup_01.pdf [file NIHMS1632028-supplement-sup_01.pdf]

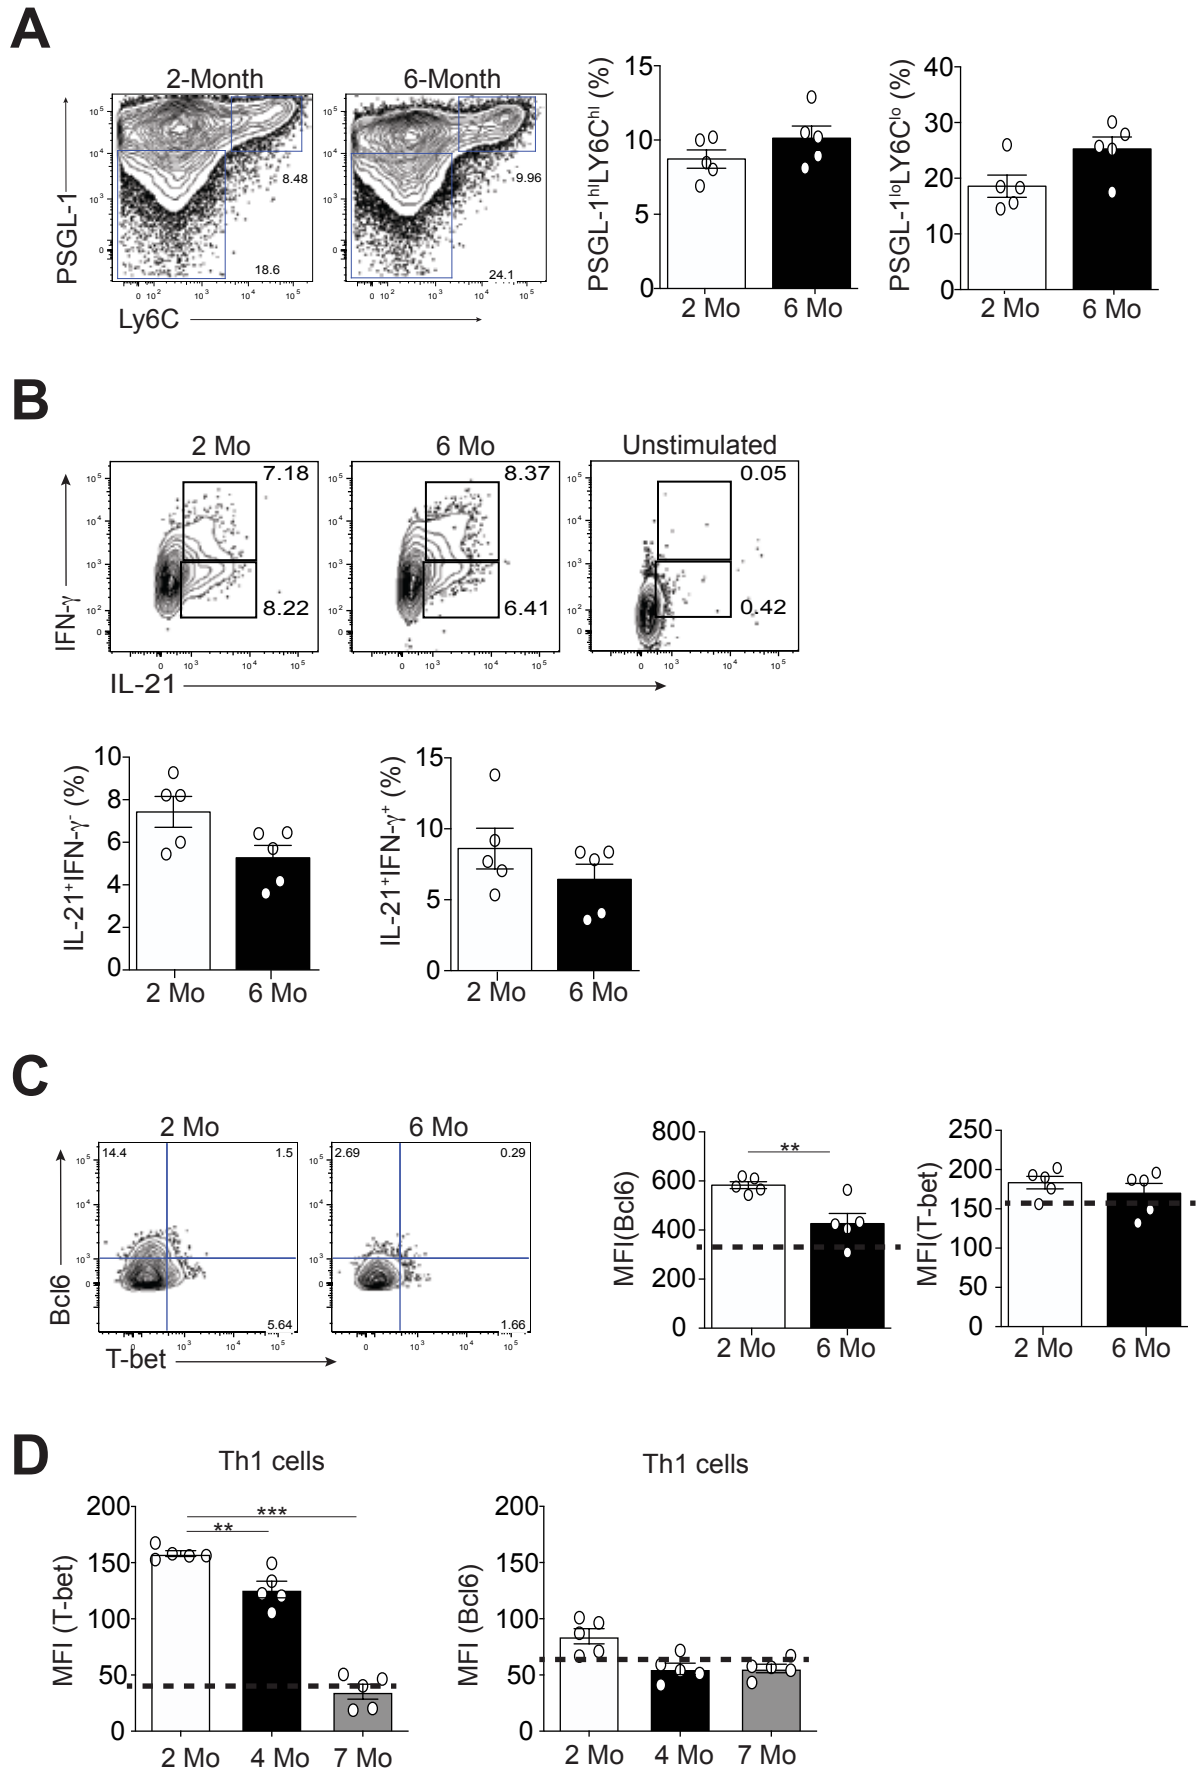

**A**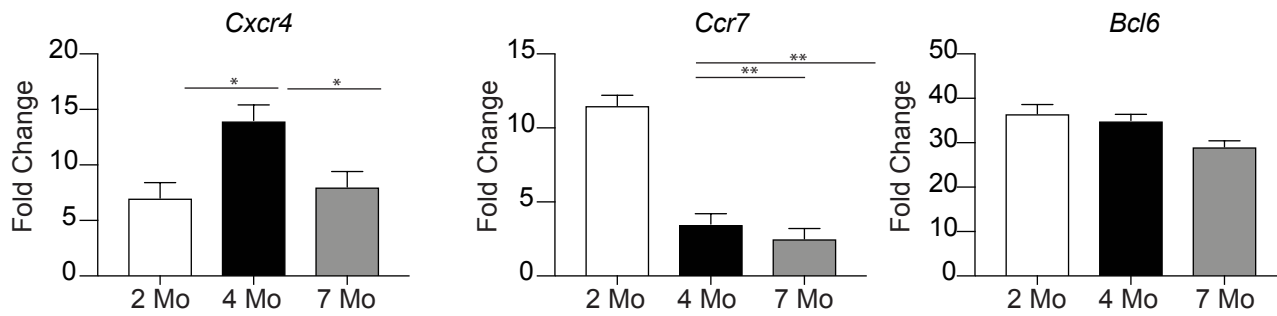**B**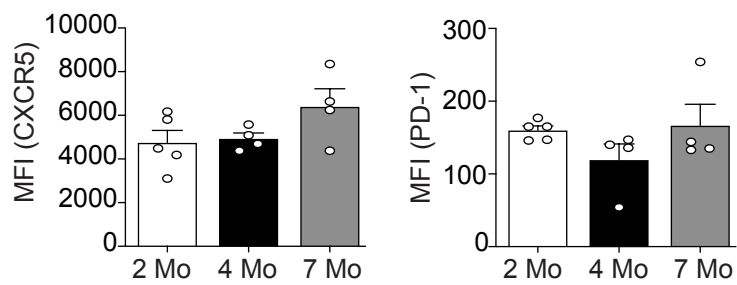**C**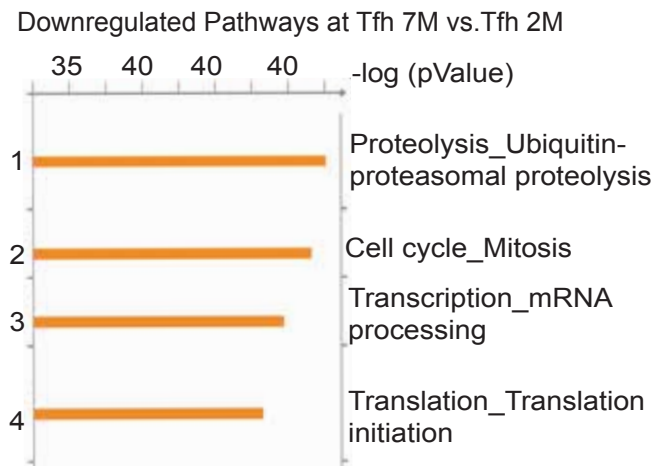

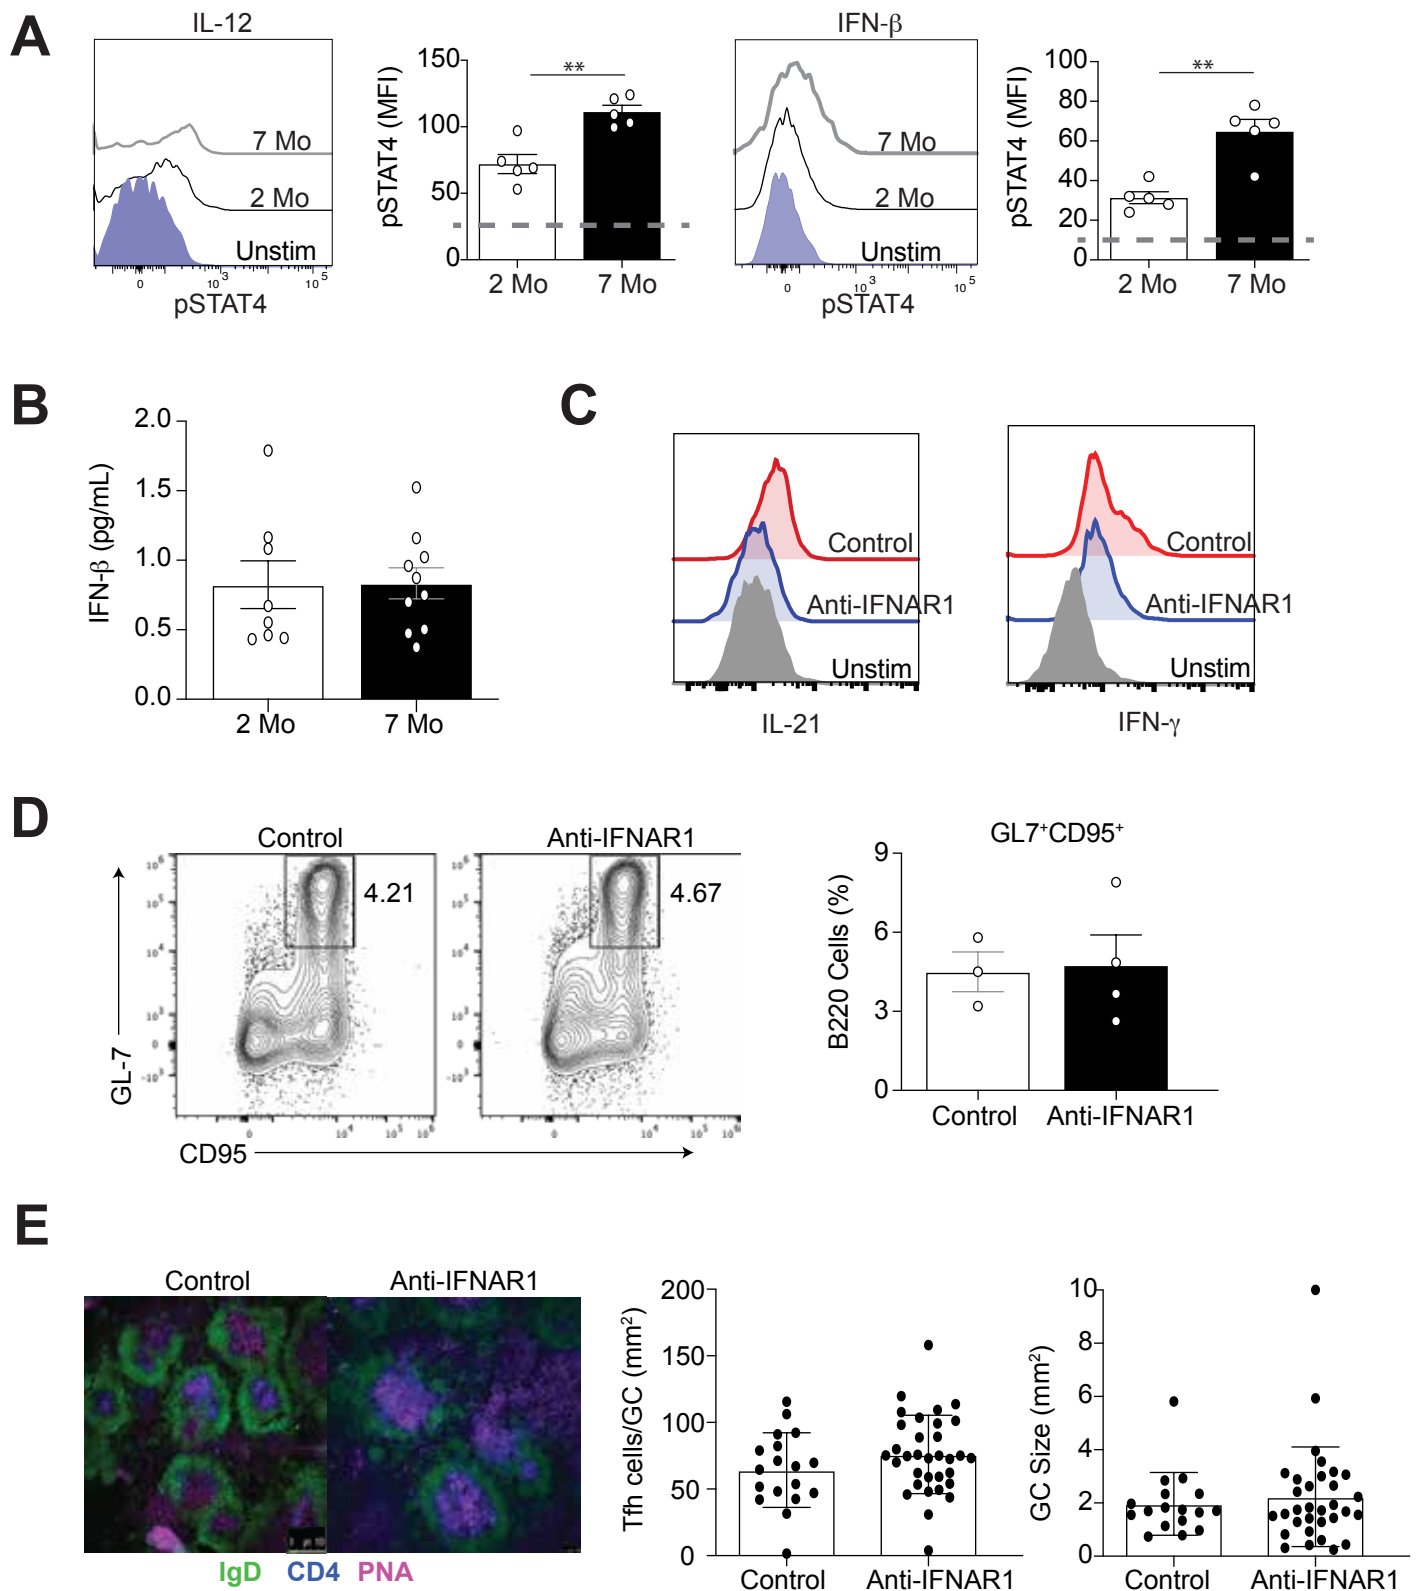

**A**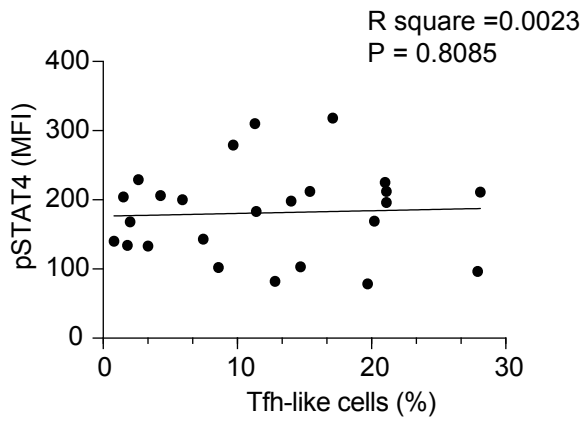**B**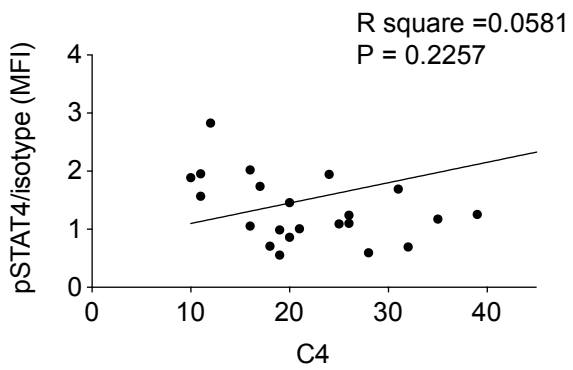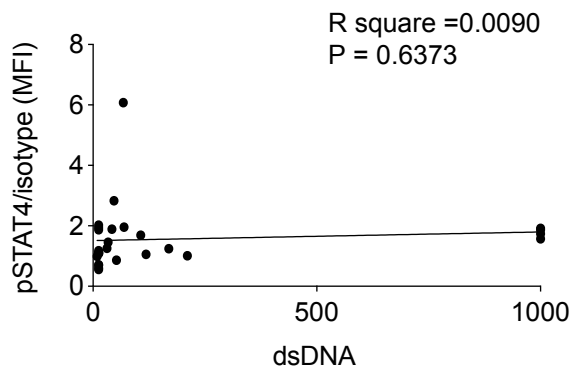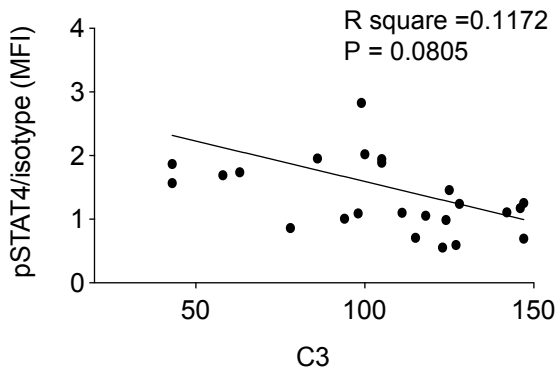

Supplemental Table 1

|                  | <b>Healthy Control</b> | <b>SLE</b> |
|------------------|------------------------|------------|
| Female           | 12                     | 23         |
| Male             | 7                      | 2          |
| Age              | 37 +/-11               | 39+/- 12   |
| Race             |                        |            |
| White            | 9                      | 6          |
| African American | 4                      | 13         |
| Hispanic         | 4                      | 6          |
| Asian            | 2                      |            |
| Avg SLEDAI       | NA                     | 10+/- 6.5  |

**Supplementary Table 2: Antibodies used for flow cytometry, ELISA, microscopy and *in vivo***

| Antigen           | Dilution | Clone             | Fluorochrome     | Source          |
|-------------------|----------|-------------------|------------------|-----------------|
| CD4               | 1:200    | RM4-5             | Alexa 700, BV510 | eBioscience     |
| CD44              | 1:200    | IM7               | e450             | eBioscience     |
| PD-1              | 1:200    | J43               | PE-Cy7           | eBioscience     |
| IgD               | 1:200    | 11-26             | e450             | eBioscience     |
| B220              | 1:500    | RA3-6B2           | PE-Texas Red     | BD Biosciences  |
| CXCR5             | 1:100    | 2G8               | BV605            | BD Biosciences  |
| GL-7              | 1:200    | GL-7              | FITC             | BD Biosciences  |
| CD95              | 1:200    | Jo2               | PE-Cy7           | BD Biosciences  |
| IL-21R-FC chimera | 1:50     | Cat # 596-MR      |                  | R&D Systems     |
| Ly6C              | 1:200    | AL-21             | Fitc             | BD Biosciences  |
| IFN-g             | 1:500    | XMG1.2            | PeCy7            | BD Biosciences  |
| PSGL-1            | 1:1000   | 2PH1              | APC              | BD Biosciences  |
| pSTAT4            | 1:10     | SLEB11            | APC              | BD Biosciences  |
| Tbet              | 1:100    | eBio4B10          | APC              | eBiosciences    |
| Bcl6              | 1:100    | K112-91           | PE               | BD Biosciences  |
| CD4               | 1:200    | RM4-5             | FITC             | eBiosciences    |
| IgD               | 1:200    | 11-26             | Alexa 647        | eBiosciences    |
| PNA               | 1:500    |                   | Biotin           | Vector Labs     |
| FITC              | 1:200    | Rabbit polyclonal | Alexa 488        | Invitrogen      |
| Streptavidin      | 1:200    |                   | Alexa 555        | Invitrogen      |
| Anti-IgG1 AP      | 1:2000   | Goat polyclonal   | ALP              | Sothorn Biotech |
| Anti-IgG2c AP     | 1:2000   | Goat polyclonal   | ALP              | Sothorn Biotech |
| CXCR4             | 1:100    | L276F12           | Alexa Flour 647  | Biolegend       |
| CD86              | 1:100    | GL-1              | PE               | Biolegend       |
| IFNAR1            | 1:20     | Mar1-5A3          | PE               | Biolegend       |
| IFNAR1            | 600ug    | Mar1-5A3          | Purified         | BioXcell        |
| Anti-Rat IgG      | 1mg      |                   | Purified         | Sigma-Aldrich   |
| CD4               | 1:25     | ROA-T4            | V500             | BD Biosciences  |
| CD45RA            | 1:50     | HI100             | V450             | BD Biosciences  |
| CXCR5             | 1:25     | RF8B2             | Alexa Flour 488  | BD Biosciences  |
| CCR7              | 1:50     | 4B12              | APC 780          | Ebioscience     |
| PD-1              | 1:50     | EH12.1            | PeCy7            | BD Biosciences  |
| IFNG              | 1:25     | B27               | BV510            | BD Biosciences  |
| IL-21             | 1:25     | 3A3-N2.1          | 647              | BD Biosciences  |
| pSTAT4            | 1:10     | pY693             | 647              | BD Biosciences  |
